# Supplementary material for: Multifaceted Role of PheDof12-1 in the Regulation of Flowering Time and Abiotic Stress Responses in Moso Bamboo (Phyllostachys edulis)
Source: PubMed Central journal article supplement (PMC6358834; doi:10.3390/ijms20020424), 2019-01-19
Supplement: ijms-20-00424-s001.pdf [file ijms-20-00424-s001.pdf]

### Zinc-finger

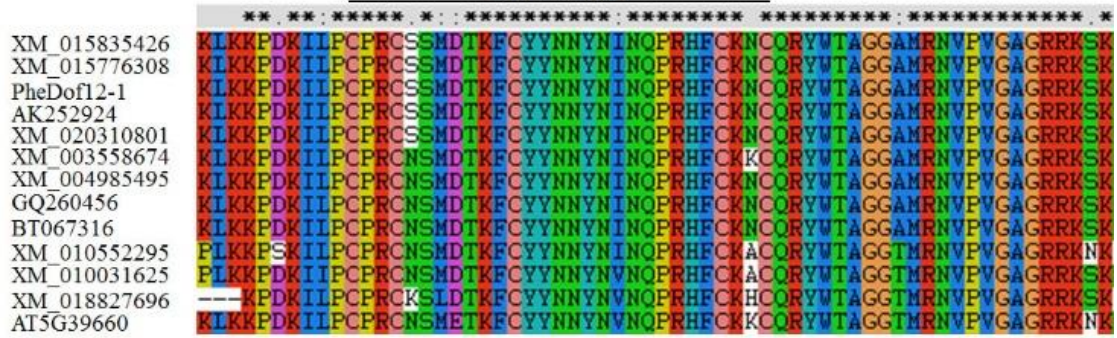

**Figure. S1. Multiple alignment of deduced amino acid sequences of Dof proteins among different plants.** The putative signal peptide and conservative C2C2-type zinc-finger motif at N-terminal end are labeled. The highly conserve C residues in N-terminal are shaded in pink.

Table 1. primers were used for gene cloning and qRT-PCR.

| Gene            | Primer sequence (5'→3')                                 |
|-----------------|---------------------------------------------------------|
| 2300-PheDof12-1 | Forward<br>GGAAATTCATGGGGGCGTGCAGGGCAG                  |
|                 | Reverse<br>GGGTACCTCAAGATCCCTCTTGAAGGTCAGT              |
| GFP-PheDof12-1  | Forward<br>GGGTACCATGGGGGCGTGCAGGGCAG                   |
|                 | Reverse<br>GCGTCGACAGATCCCTCTTGAAGGTCAGT                |
| AD-PheDof12-1   | Forward<br>GCAGAGTGGCCATTATGGCCATGGGGGCGTGCAGGGCAG      |
|                 | Reverse<br>GCGGCCGACATGTTTTTCCCTCAAGATCCCTCTTGAAGGTCAGT |
| qRT-PheDof12-1  | Forward<br>AGGGCAGCGCAGGAGGA                            |
|                 | Reverse<br>TTTCTGTACTTTTGGTTCCGTCGT                     |
| pHIIS-PheCOL4   | Forward<br>CGAATTCGCGGGAGCTCAACTGCTTCCGATTAATGTCTAC     |
|                 | Reverse<br>CGCGGATCGATTGCGGAAGTCTAGACTTCTAATGCAAGCGTTT  |
| qRT-PheCOL4     | Forward<br>ACTCCATGAACACAGCGTA                          |
|                 | Reverse<br>GAATGGTCTTCTCGAACCGC                         |
| TIP41           | Forward<br>AAAATCATTGTAGGCCATTGTCG                      |
|                 | Reverse<br>ACTAAATTAAGCCAGCGGGAGTG                      |
| NTB             | Forward<br>TCTGTTTGACACCGAAGAGGAG                       |
|                 | Reverse<br>AATAGCTGTCCCTGGAGGAGTTT                      |
| Actin           | Forwards<br>GTATGTGGCTATTCAGGCTGT                       |
|                 | Reverse<br>CTGGCGGTGCTTCTTCTCTG                         |
| FT              | Forward<br>CTTGGCAGGCAAACAGTGTATGCAC                    |
|                 | Reverse<br>GCCACTCTCCCTCTGACAATTGTAGA                   |
| SOC1            | Forward<br>AGCTGCAGAAAACGAGAAGCTCTCTG                   |
|                 | Reverse<br>GGGCTACTCTTTCATCACCTCTCC                     |
| AGL24           | Forward<br>GAGGCTTTGGAGACAGAGTCGGTGA                    |
|                 | Reverse<br>AGATGGAAGCCCAAGCTCAGGGAA                     |
| FLC             | Forward<br>AGCCAAGAAGACCGAACTCA                         |
|                 | Reverse<br>TTTGTCCAGCAGGTGACATC                         |
| SVP             | Forward<br>CAAGGACTTGACATTGAAGAGCTTCA                   |
|                 | Reverse<br>CTGATCTCACTATAATCTTGTAC                      |
